# Supplementary material for: N-Doped carbon nanotube encapsulated cobalt for efficient oxidative esterification of 5-hydroxymethylfurfural
Source: Royal Society of Chemistry journal article supplement (doi:10.1039/d1re00542a), 2022-01-01
Supplement: d1re00542a1.pdf [file d1re00542a1.pdf]

## Supporting information

### **N-doped Carbon Nanotube Encapsulated Cobalt for Efficient Oxidative Esterification of 5-Hydroxymethylfurfural**

Linhao Yu,<sup>b</sup> Saravanan Kasipandi,<sup>c</sup> Hong Chen,<sup>\*a</sup> Yingying Li,<sup>a</sup> Xueli Ma,<sup>a</sup> Zhe Wen<sup>b</sup>  
and Yongdan Li<sup>b,c</sup>

<sup>a</sup> *School of Environmental Science and Engineering, Tianjin University, Tianjin 300072, China*

<sup>b</sup> *School of Chemical Engineering and Technology, Tianjin University, Tianjin 300072, China; Collaborative Innovation Center of Chemical Science and Engineering (Tianjin), Tianjin, 300072, China*

<sup>c</sup> *Department of Chemical and Metallurgical Engineering, School of Chemical Engineering, Aalto University, Espoo 02150, Finland*

\*Corresponding authors: E-mail: [chenhong\\_0405@tju.edu.cn](mailto:chenhong_0405@tju.edu.cn) (H. Chen).

**Table S1** The Co leaching concentration detected by ICP-MS

| Reycle No. | Cat.       | Co leaching content (ppm) |
|------------|------------|---------------------------|
| 1          | Co/GCN-800 | 15.2                      |
| 2          | Co/GCN-800 | 4.3                       |

Reaction conditions: 1 mmol HMF, 20 mL methanol, 1 MPa O<sub>2</sub>, reaction time 16 h, temperature 130 °C.

**Table S2** The previous reported for the oxidative esterification of HMF to FDMC

| Entry | Cat.                                     | HMF<br>Conv. (%) | FDMC<br>yield. (%) | Ref. |
|-------|------------------------------------------|------------------|--------------------|------|
| 1     | PdCoBi/C                                 | 99               | 96                 | 1    |
| 2     | Au-CeO <sub>2</sub>                      | 99               | 99                 | 2    |
| 3     | C <sub>ox</sub> O <sub>y</sub> -N@C+Ru@C | 100              | 99                 | 3    |
| 4     | Au/TiO <sub>2</sub>                      | >99              | 98                 | 4    |
| 5     | Co@C-N(800)                              | 99               | 91                 | 5    |
| 6     | Co@CN                                    | 100              | 95                 | 6    |

**Table S3** The oxidative esterification of HMF in different solvent

| Entry | Solvent    | HMF<br>Conv. (%) | Esterification product<br>yield (%) |
|-------|------------|------------------|-------------------------------------|
| 1     | ethnaol    | 91.8             | 42.7                                |
| 2     | n-propanol | 65.4             | 13.2                                |

Reaction conditions: 1 mmol HMF, 0.05 g catalyst, 20 mL solvent, 1 MPa O<sub>2</sub>, reaction time 16 h, temperature 130 °C.

## Characterization

The FT-IR spectrums of catalysts was measured with IRAffinity-1S instrument. The CO<sub>2</sub> temperature-programmed desorption (CO<sub>2</sub>-TPD) experiments were carried out on Tianjin Xianquan Chemisorption analyzer instrument. The NH<sub>3</sub>-TPD was performed on a Micromeritics 2920 Autochem II Chemisorption Analyzer. The ICP-MS was carried out on Thermo fisher iCAP-7000 series instrument.

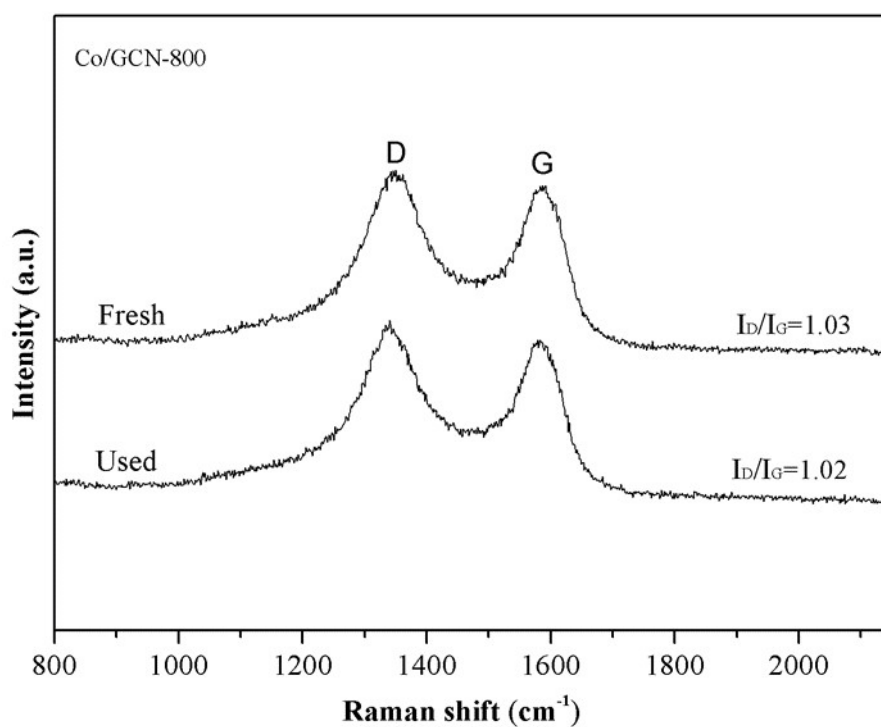

**Fig. S1** Raman spectra of fresh and reused the Co/GCN-800 samples.

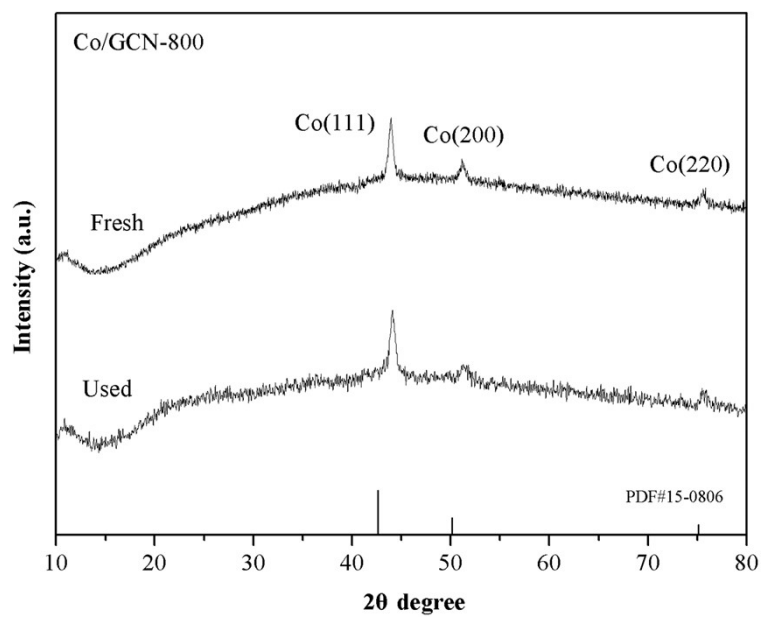

**Fig. S2** XRD pattern of Co/GCN-800 before and after the reaction

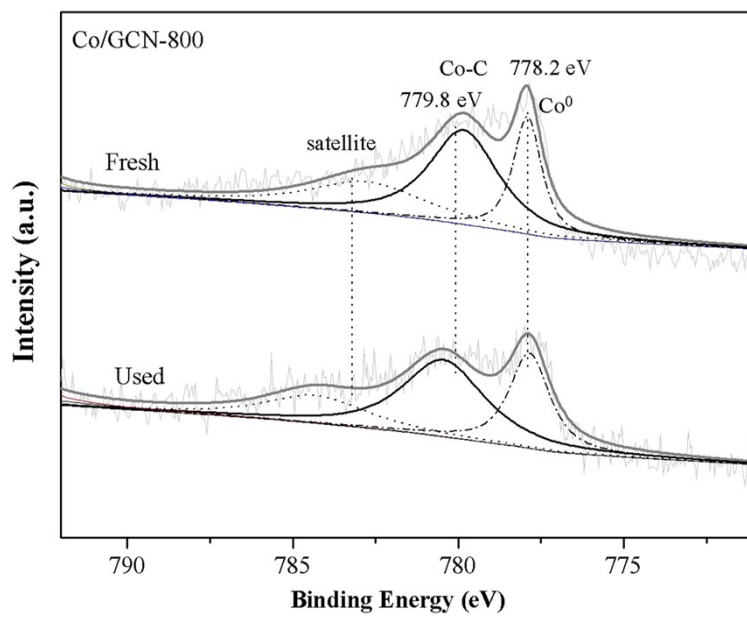

**Fig. S3** Co 2p<sub>2/3</sub> spectra of Co/GCN-800 before and after the reaction

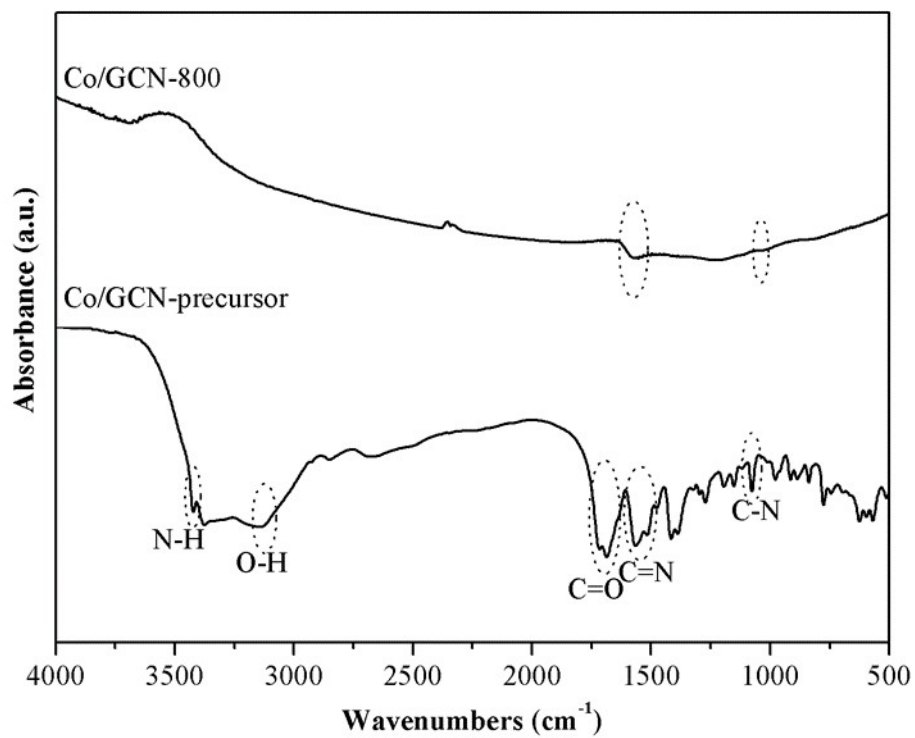

**Fig. S4** FT-IR spectra of Co/GCN-800 and Co/GCN-precursor

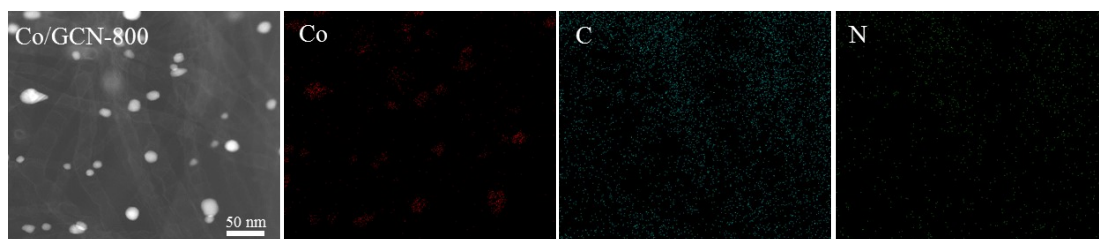

**Fig. S5** The TEM mapping of Co/GCN-800

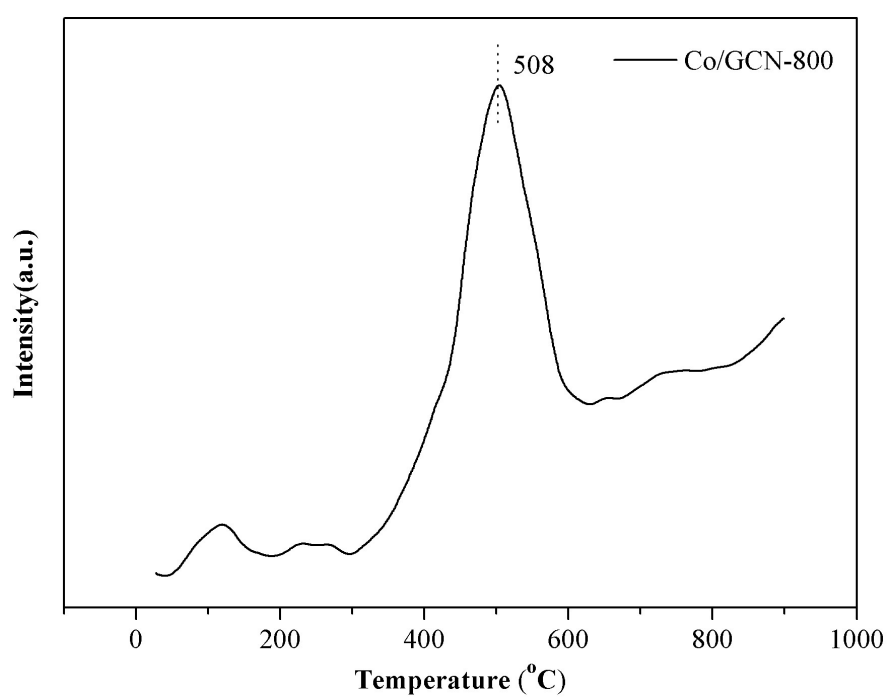

**Fig. S6** CO<sub>2</sub>-TPD of Co/GCN-800

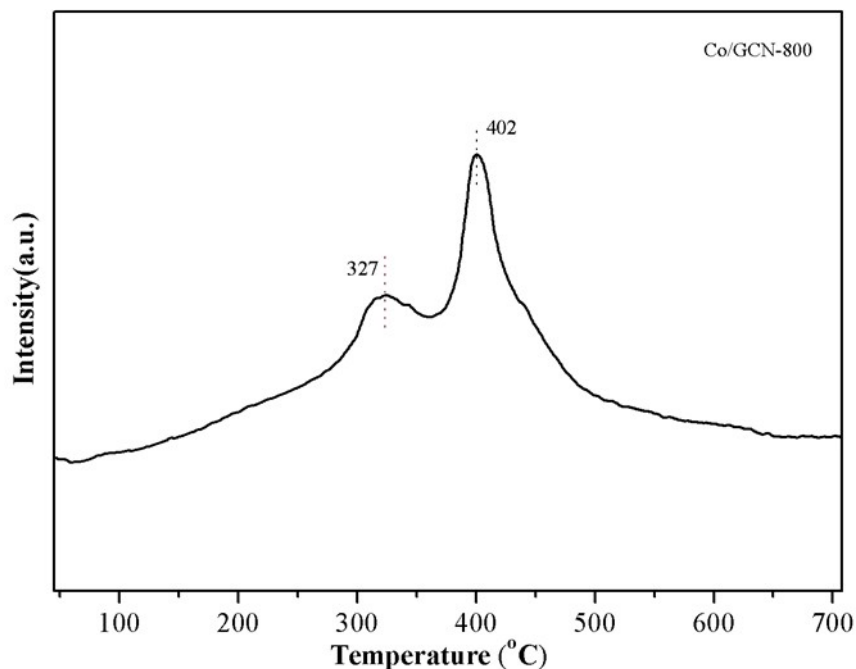

**Fig. S7** NH<sub>3</sub>-TPD of Co/GCN-800

## Reference

1. F. Li, X. L. Li, C. Li, J. Shi and Y. Fu, *Green Chem.*, 2018, **20**, 3050-3058.
2. O. Casanova, S. Iborra and A. Corma, *J. Catal.*, 2009, **265**, 109-116.
3. A. Salazar, P. Hunemorder, J. Rabeah, A. Quade, R. V. Jagadeesh and E. Mejia, *ACS Sustainable Chem. Eng.*, 2019, **7**, 12061-12068.
4. E. Taarning, I. S. Nielsen, K. Egeblad, R. Madsen and C. H. Christensen, *ChemSusChem*, 2008, **1**, 75-78.
5. Y. C. Fen, W. L. Jia, G. H. Yan, X. H. Zeng, J. Sperry, B. B. Xu, Y. Sun, T. Z. Lei and L. Lin, *J. Catal.*, 2020, **381**, 570-578.
6. K. K. Sun, S. J. Chen, Z. L. Li, G. P. Lu and C. Cai, *Green Chem.*, 2019, **21**, 1602-1608.
